# Supplementary material for: Single-cell transcriptomic analysis reveals a systemic immune dysregulation in COVID-19-associated pediatric encephalopathy
Source: PubMed Central journal article supplement (PMC10582072; doi:10.1038/s41392-023-01641-y), 2023-10-18
Supplement: 41392_2023_1641_MOESM1_ESM.pdf [file 41392_2023_1641_MOESM1_ESM.pdf]

---

## Supplementary Materials for

### Single-cell transcriptomic analysis reveals a systemic immune dysregulation in COVID-19-associated pediatric encephalopathy

Yi Wang<sup>1,\*</sup>, Laurence Don Wai Luu<sup>2,\*</sup>, Shuang Liu<sup>3,\*</sup>, Xiong Zhu<sup>4,\*</sup>, Siyuan Huang<sup>3,\*</sup>, Fang Li<sup>3</sup>, Xiaolan Huang<sup>1</sup>, Linying Guo<sup>3</sup>, Jin Zhang<sup>3</sup>, Haiyan Ge<sup>3</sup>, Yuanyuan Sun<sup>3</sup>, Yi Hui<sup>3</sup>, Yanning Qu<sup>3</sup>, Huicong Wang<sup>3</sup>, Xiaoxia Wang<sup>4</sup>, Weilan Na<sup>3</sup>, Juan Zhou<sup>1</sup>, Dong Qu<sup>3</sup> and Jun Tai<sup>5</sup>

Correspondence to: [wildwolf0101@163.com](mailto:wildwolf0101@163.com); [qudong2012@126.com](mailto:qudong2012@126.com); [trentj@163.com](mailto:trentj@163.com);

**The file includes:**

**Supplementary Figure 1-8 with their legends**

**a**

| Patient | AE1 | AE2 | AE3 | AE4 | AE5 | AE6 | AE7 | AE8 | AE9 | AE10 | AE11 | AE12 | AE13 | AE14 | AE15 | Outcomes |
|---------|-----|-----|-----|-----|-----|-----|-----|-----|-----|------|------|------|------|------|------|----------|
| P1      |     |     |     |     |     |     |     |     |     |      |      |      |      |      |      | Survival |
| P2      |     |     |     |     |     |     |     |     |     |      |      |      |      |      |      | Death    |
| P3      |     |     |     |     |     |     |     |     |     |      |      |      |      |      |      | Death    |
| P4      |     |     |     |     |     |     |     |     |     |      |      |      |      |      |      | Survival |
| P5      |     |     |     |     |     |     |     |     |     |      |      |      |      |      |      | Survival |
| P6      |     |     |     |     |     |     |     |     |     |      |      |      |      |      |      | Survival |
| P7      |     |     |     |     |     |     |     |     |     |      |      |      |      |      |      | Survival |
| P8      |     |     |     |     |     |     |     |     |     |      |      |      |      |      |      | Survival |
| P9      |     |     |     |     |     |     |     |     |     |      |      |      |      |      |      | Survival |
| P10     |     |     |     |     |     |     |     |     |     |      |      |      |      |      |      | Survival |
| P11     |     |     |     |     |     |     |     |     |     |      |      |      |      |      |      | Survival |

Sampling days after illness onset: 1 2 3 4 5 6 7 8 9 10 11 12 13 14 15

Note: COVID-19 patients with encephalopathy or with severe symptoms were collected from ICU.

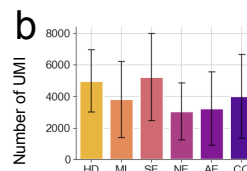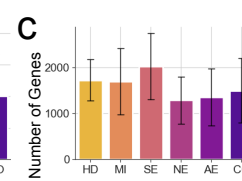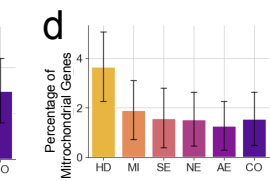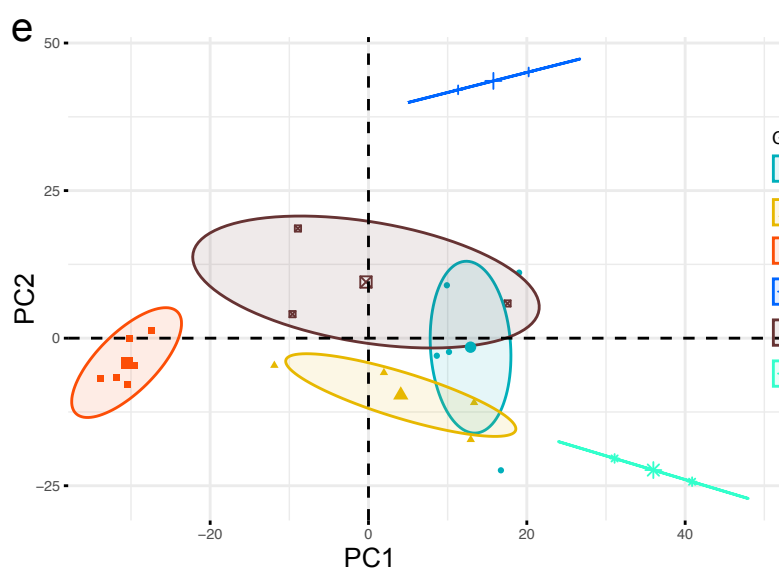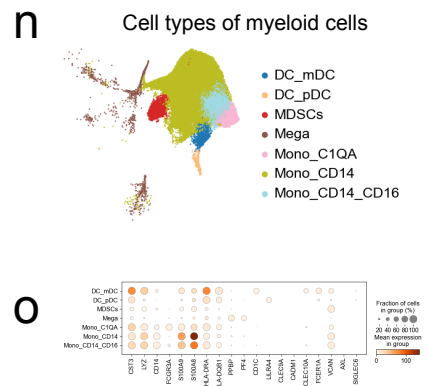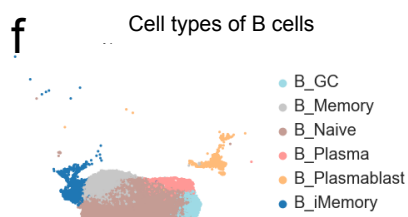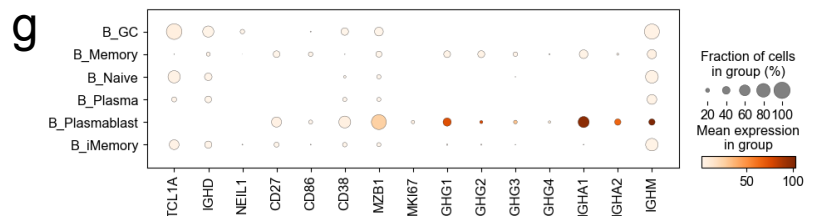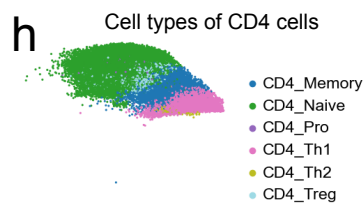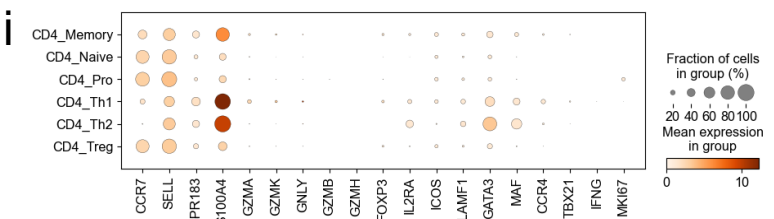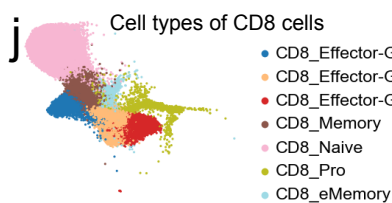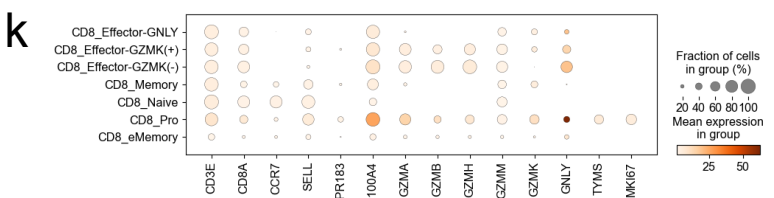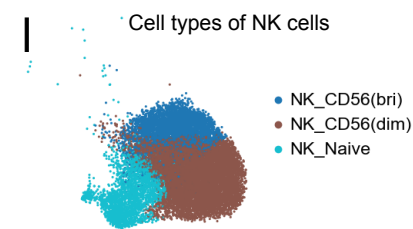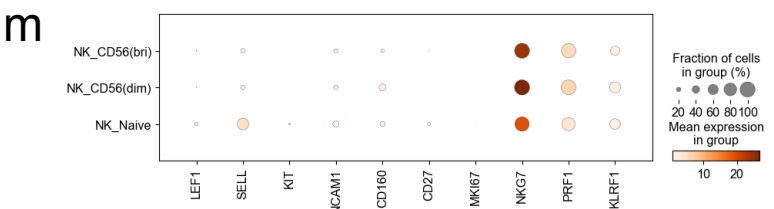

---

**Supplementary Fig 1. Characteristics of the integrated dataset and selected markers for cell sets/subsets in different cell lineages, related to Figure 1.**

a. Timeline of blood sample collection in the 11 subjects.

b-d. Distribution of the unique molecular identifier (UMI) counts per cell (b), gene counts per cell (d), and percentage of mitochondrial transcripts per cell (d) detected for cells in each disease group. The error bars represent Standard Error (SE).

e. A visualization of principal component analysis (PCA) of sample variables. Each point represents one sample (green circle for AE, yellow triangle for CO, red square for HD, blue cross for MI, brown rectangle for NE, light blue asterisks for SE). The slightly larger shape represents the group means. The ellipses around the group mean represent the confidence regions.

f, h, j, l, n. The clustering result of B (f), CD4<sup>+</sup>T (h), CD8<sup>+</sup>T (j), NK (l) and Myeloid (n) cell subsets. Each point represents one single cell, colored according to cell type.

g, i, k, m, o. Dot plots of selected marker genes (Rows) for cell subsets (Columns) within each cell lineage, including B (g), CD4<sup>+</sup>T (i), CD8<sup>+</sup>T (k), NK (m) and Myeloid (o) cell subsets.



---

**Supplementary Fig 2. Detailed data output and visualization of single-cell transcriptomic profiling of PBMCs from 22 samples, related to Figure 1.**

- a. The UMAP projection for the six conditions on different panels. Cells are colored by the 8 major cell types.
- b. Stacked bar plot showing the relative proportion of the 8 cell subtypes derived from HD, MI, SE, NE, AE and CO conditions.
- c. Stack bar plot showing the relative proportion of the 8 cell subtypes for each of the 22 samples.
- d. The UMAP projection for the 22 individual samples with different colors. Cells are colored according to each sample.
- e. The distribution of each immune cell type across 6 conditions. The y-axis shows the average percentage of each immune cell type. Conditions are displayed in different colors on the *x* axis.

Significant differences in d, e, f and h were determined by Two-sided Student's T-test with Bonferroni correction (\* $p < 0.05$ , \*\* $p < 0.01$ , \*\*\* $p < 0.001$ , \*\*\*\* $p < 0.0001$ , <sup>ns</sup> $p > 0.05$ ). The error bars represent Standard Error (SE), and the median is shown as horizontal bars.

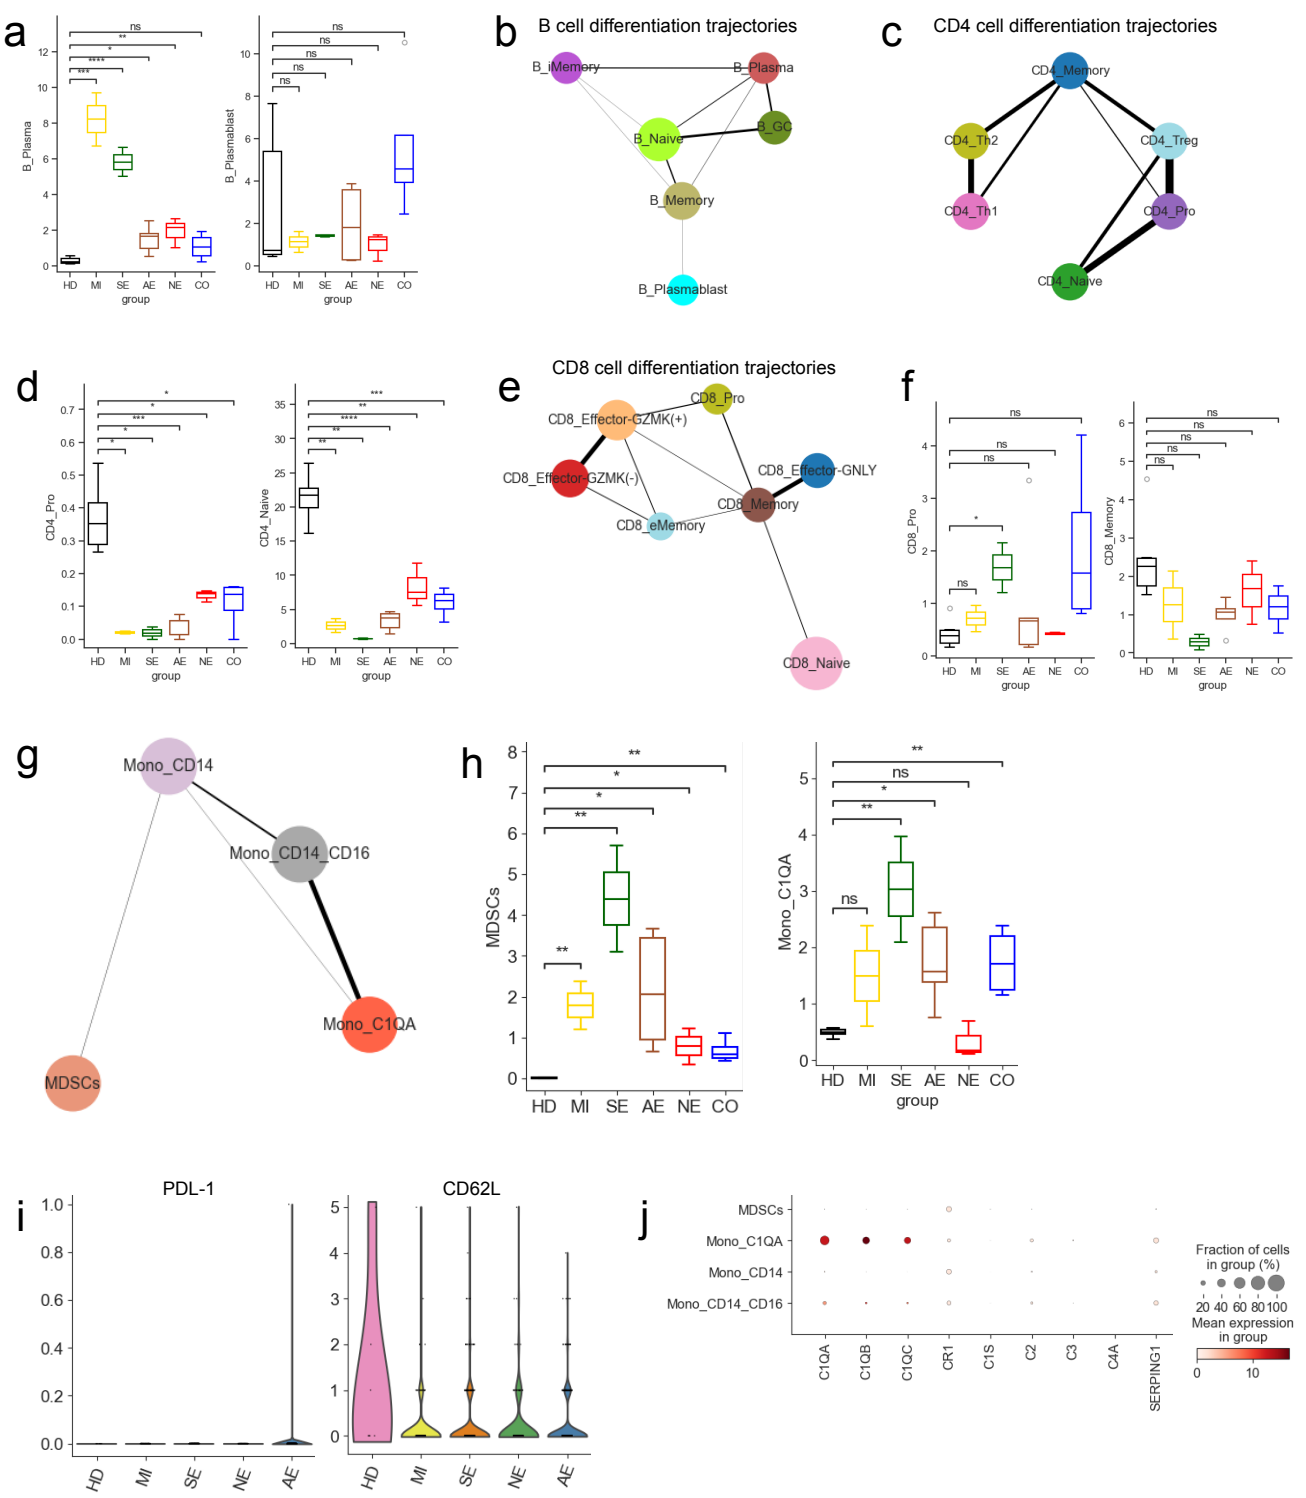

---

**Supplementary Fig 3. Comparison of different immune cell types among patient groups, related to Figure 2.**

- a. The distribution of B\_Plasma and B\_Plasmablast across 6 conditions.
- b. PAGA analysis of B cell pseudo-time: the associated cell type and the corresponding status are listed.
- c. PAGA analysis of CD4<sup>+</sup> T cell pseudo-time: the associated cell type and the corresponding status are listed.
- d. The distribution of CD4\_Pro and CD4\_Naive across 6 conditions.
- e. PAGA analysis of CD8<sup>+</sup> T cell pseudo-time: the associated cell type and the corresponding status are listed.
- f. The distribution of CD8\_Pro and CD4\_Memory across 6 conditions.
- g. PAGA analysis of monocyte cell pseudo-time: the associated cell type and the corresponding status are listed.
- h. The distribution of MDSCs and Mono\_C1QA across 6 conditions.
- i. Violin plots of selected genes for MDSCs across different conditions.
- j. Dot plots of selected marker genes (Rows) for monocyte subsets (Columns) within each cell lineage,

Significant differences in a, d, f and h were determined by Two-sided Student's T-test with Bonferroni correction (\* $p < 0.05$ , \*\* $p < 0.01$ , \*\*\* $p < 0.001$ , \*\*\*\* $p < 0.0001$ , <sup>ns</sup> $p > 0.05$ ). The error bars represent Standard Error (SE), and the median is shown as horizontal bars.

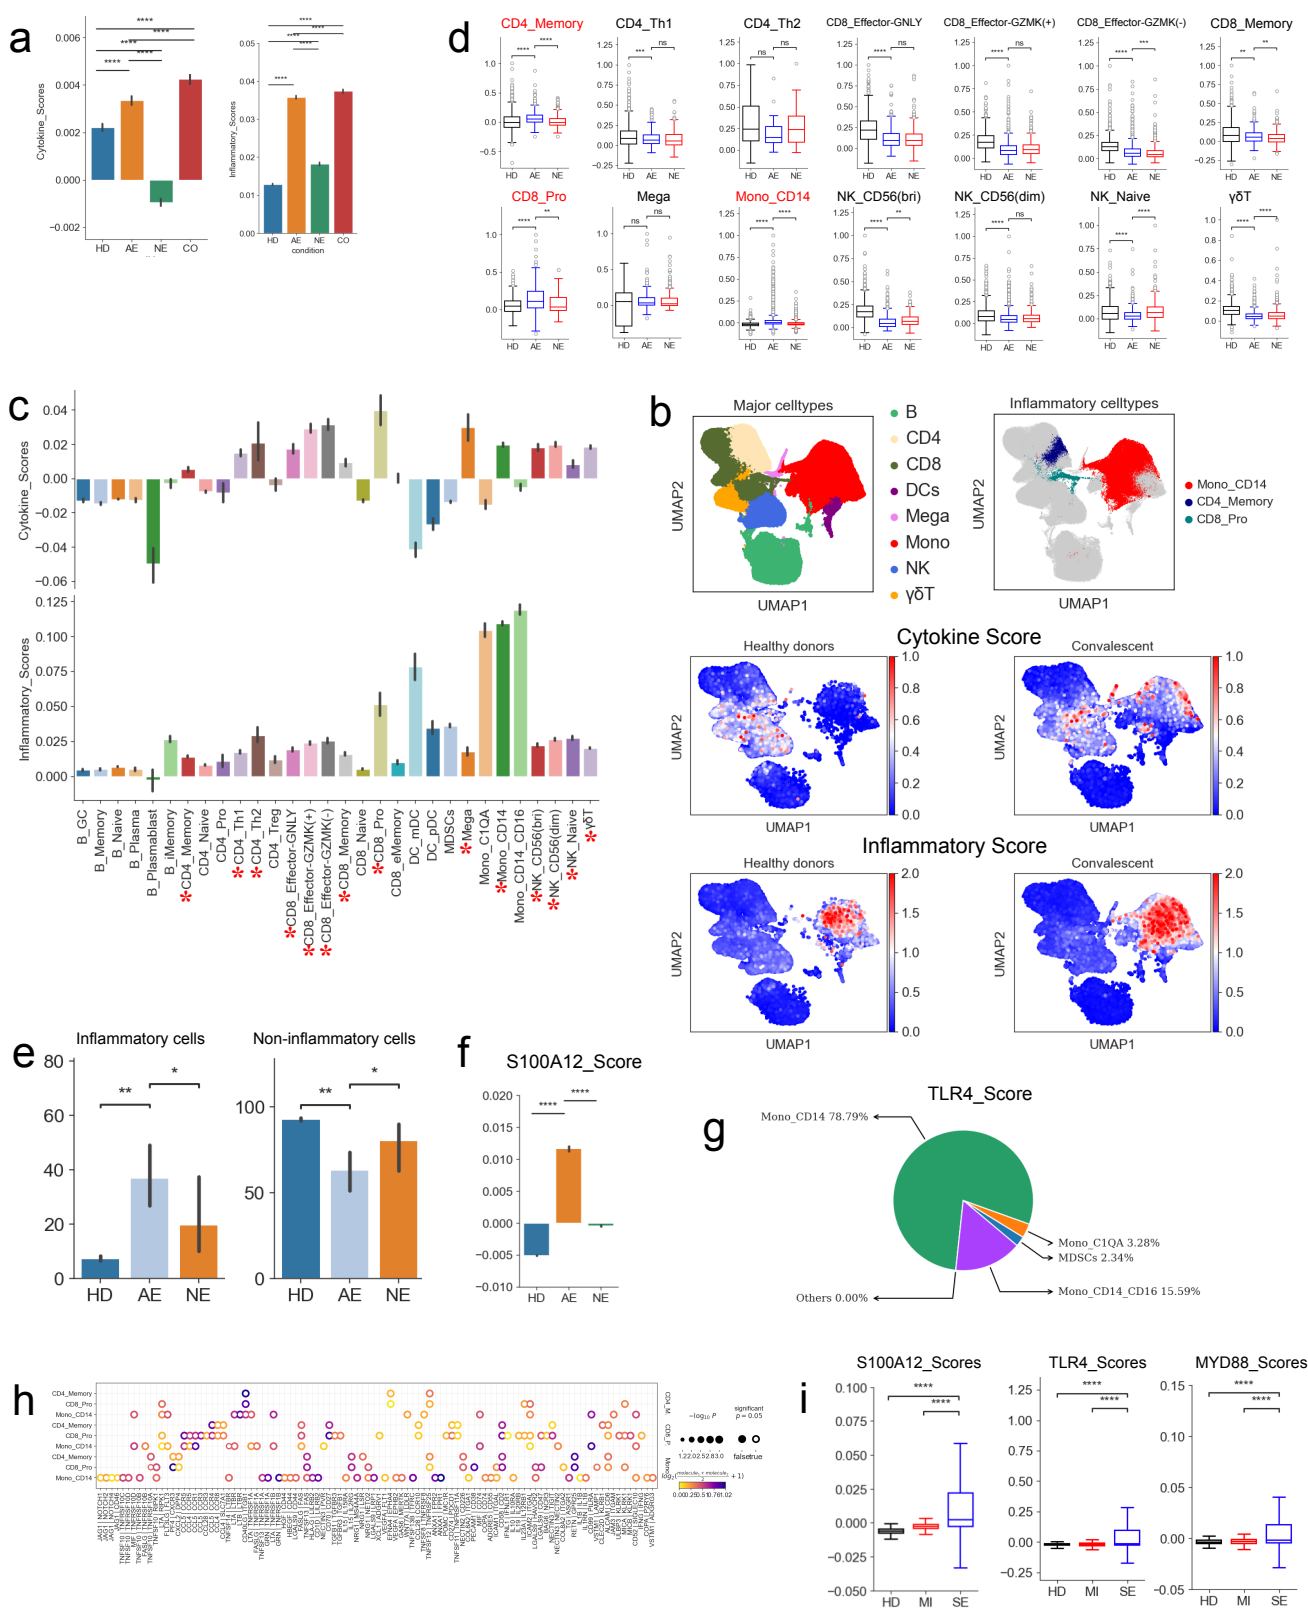



---

**Supplementary Fig 4. Details of hyper-inflammatory subtypes associated with cytokine storm in PBMCs, related to Figure 3**

- a. Bar plots showing the cytokine score and inflammatory score across conditions.
  - b. UMAP plots of PBMCs colored by: major cell types (Top left panel), inflammatory cell type (Top right panel), inflammatory score (Middle panel) and cytokine score (Bottom panel).
  - c. Bar plots showing the cytokine score (Top panel) and inflammatory score (Bottom panel) for each cell type.
  - d. Box plots showing cytokine score in selected cell types.
  - e. Bar plots showing the proportion of inflammatory cell types (Left panel) and other cell types (Right panel) across conditions.
  - f. Bar plots showing *S100A12* scores across conditions.
  - g. Pie charts showing the relative percentage contribution of each cell type to the *TLR4*-score.
  - h. Dot plot showing the interactions among inflammatory cell types in COVID-19 patients with acute necrotizing encephalopathy. P values are indicated by the circle sizes, as shown in the scale on the right.
  - i. Box plots showing the expression of selected genes across conditions.
- Significant differences in a, d, e, f and i were determined by Two-sided Student's T-test with Bonferroni correction (\* $p < 0.05$ , \*\* $p < 0.01$ , \*\*\* $p < 0.001$ , \*\*\*\* $p < 0.0001$ , <sup>ns</sup> $p > 0.05$ ). The error bars represent Standard Error (SE), and the median is shown as horizontal bars.

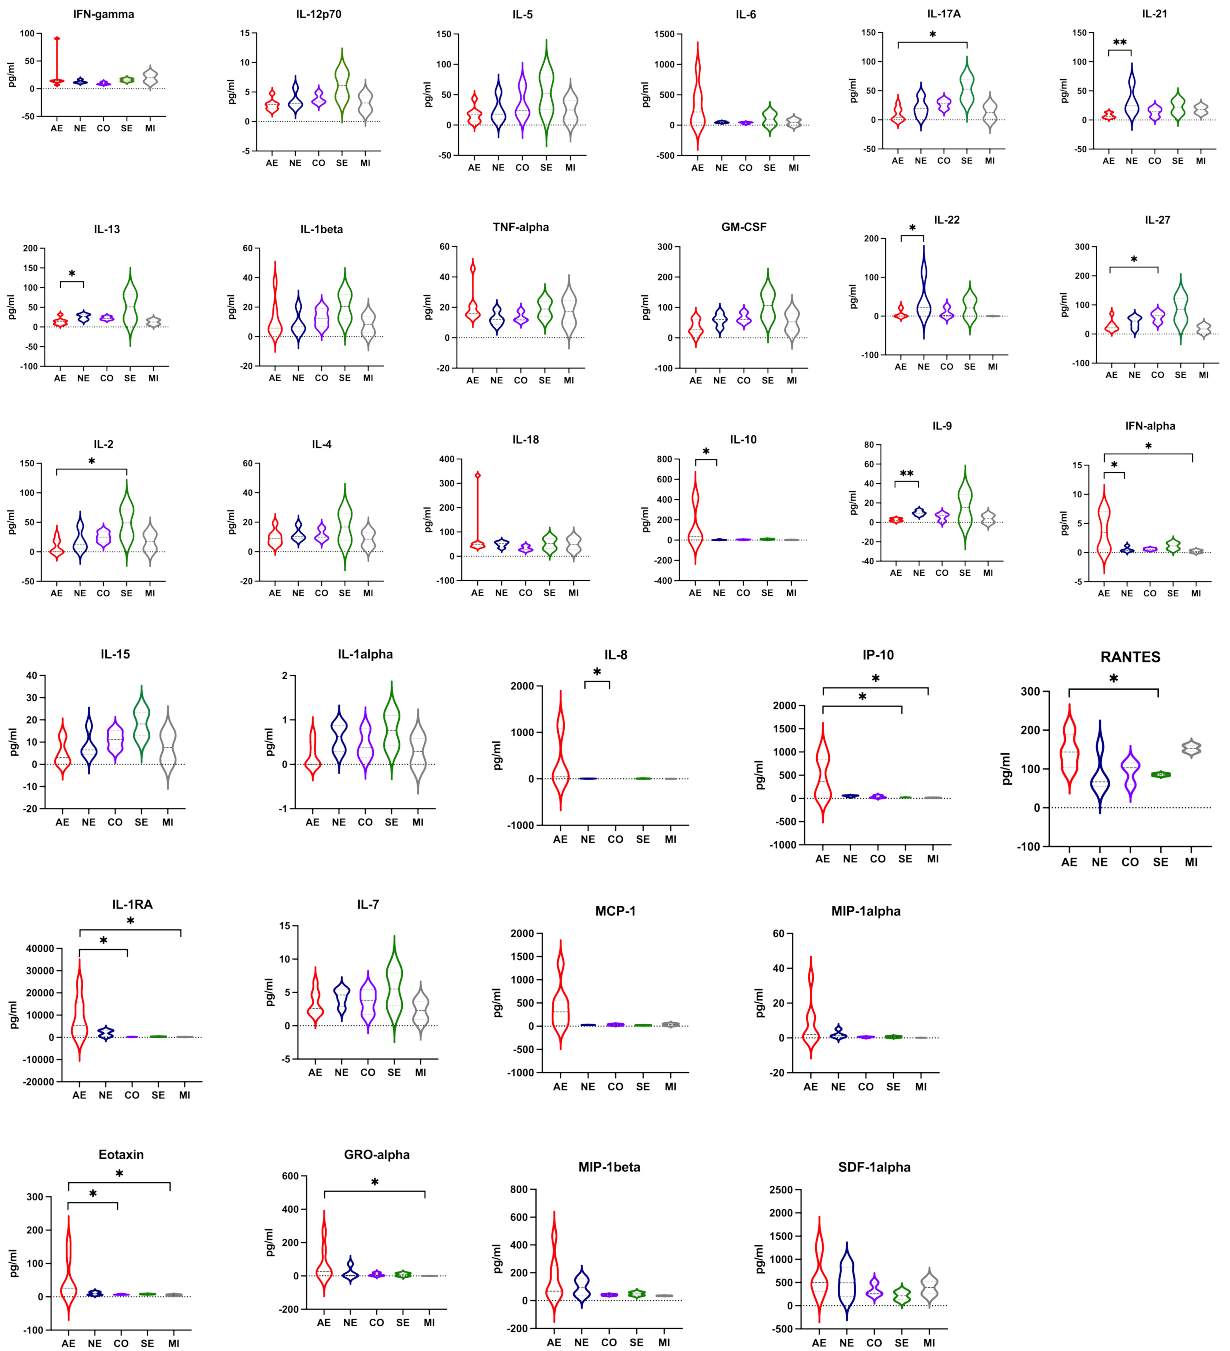

---

**Supplementary Fig 5. The levels of 32 cytokines in each group.**

Significant differences were determined by Two-sided Student's T-test with Bonferroni correction (\* $p < 0.05$ , \*\* $p < 0.01$ , \*\*\* $p < 0.001$ , \*\*\*\* $p < 0.0001$ , <sup>ns</sup> $p > 0.05$ ).



---

**Supplementary Fig 6. Characterization of gene expression differences in T cells across conditions, related to Figure 4**

- a. GO enrichment analysis of shared DEGs in COVID-19 patients identified by comparing healthy donors and COVID-19 patients with different symptoms (**Left panel**). Venn diagram and GO analysis shows the number of upregulated DEGs of encephalopathy patients and non-encephalopathy patients in T cells, comparisons as indicated (**Right panel**). DEGs refer to genes with Wilcoxon adjusted p value  $\leq 0.05$ .
  - b. Heatmap of normalized expression for selected genes (neutrophil activation-associated genes and HLA-II molecules) in T cells across different conditions (HD, MI and SE).
  - c. Bar plots of the cytotoxicity scores in each T cell subtype.
  - d. Bar plots of the apoptosis scores in each T cell subtype.
  - e. Heatmap of normalized expression for selected genes (apoptosis-associated genes) in T cells across different conditions (HD, MI and SE).
  - f. Box plot of exhaustion scores (Left) in T cells across different conditions (HD, MI and SE). Heatmap of normalized expression for selected genes (exhaustion-associated genes) in T cells across different conditions (HD, MI and SE).
  - g. Box plots of apoptosis, exhaustion, cytotoxicity and HLA-II scores in NK cells across different conditions (HD, MI, SE, NE, AE and CO).
- Significant differences in f and g were determined by Two-sided Student's T-test with Bonferroni correction (\* $p < 0.05$ , \*\* $p < 0.01$ , \*\*\* $p < 0.001$ , \*\*\*\* $p < 0.0001$ , <sup>ns</sup> $p > 0.05$ ). The error bars represent Standard Error (SE), and the median is shown as horizontal bars.

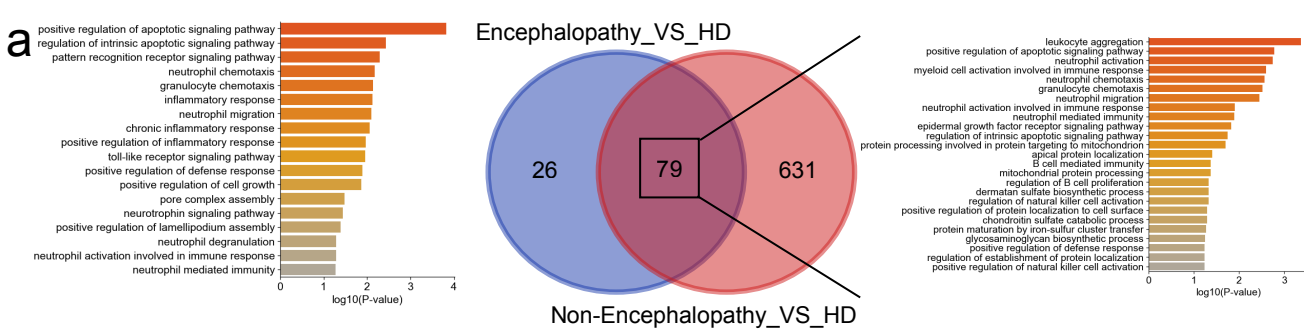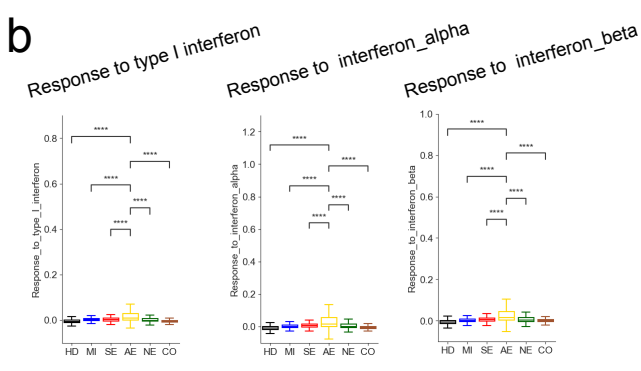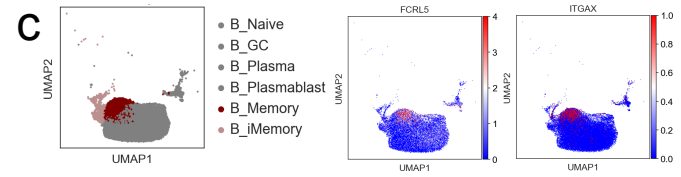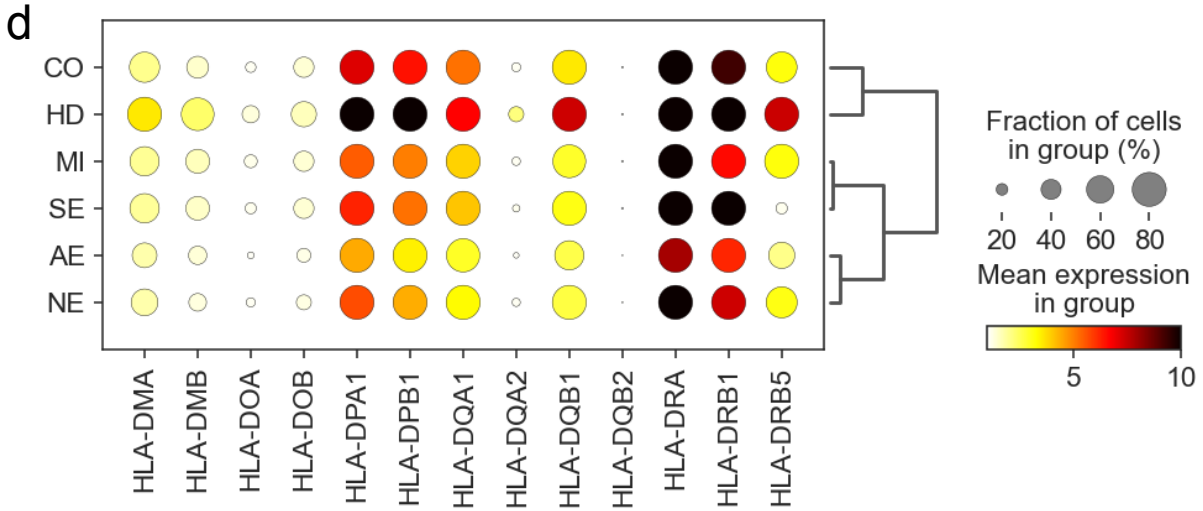

---

**Supplementary Fig 7. Characterization of gene expression differences in B cells across conditions, related to Figure 5**

- a. GO enrichment analysis of shared DEGs in COVID-19 patients identified by comparing healthy donors and COVID-19 patients with different symptoms (**Left panel**). Venn diagram and GO analysis shows the number of upregulated DEGs of encephalopathy patients and non-encephalopathy patients in B cells, comparisons as indicated (**Right panel**). DEGs refer to genes with Wilcoxon adjusted p value  $\leq 0.05$ .
- b. Box plots of three GO terms in B cells across different conditions. Y axis represents the normalized expression score of gene sets related to response\_to\_type\_I\_interferon (GO: 0034340), response\_to\_interferon\_alpha (GO: 0035455) and response\_to\_interferon\_beta (GO: 0035456), colored by condition.
- c. UMAP plots of B cells colored by: major cell types (Left panel), FCRL5 score (Middle panel), and ITGAX score (Right panel).
- d. Dot plots of the selected genes (HLA-II molecules) in B cells across conditions. Significant differences in b were determined by Two-sided Student's T-test with Bonferroni correction (\* $p < 0.05$ , \*\* $p < 0.01$ , \*\*\* $p < 0.001$ , \*\*\*\* $p < 0.0001$ , <sup>ns</sup> $p > 0.05$ ). The error bars represent Standard Error (SE), and the median is shown as horizontal bars.





---

**Supplementary Fig 8. Characterization of gene expression differences in myeloid cells across conditions, related to Figure 6**

- a. Box plot showing the relative proportion of Mono\_CD14 across HD, MI, SE, NE, AE and CO conditions.
- b. Pie charts showing the relative percentage contribution of each major cell type to the `Resposne_to_type_I_interferon` (GO: 0034340) and `cellular_response_to_type_I_interferon` (GO: 0071357).
- c. Pie charts showing the relative percentage contribution of each monocyte subtype to the `resposne_to_type_I_interferon` (GO: 0034340) and `cellular_response_to_type_I_interferon` (GO: 0071357).
- d. Dot plots of selected genes (inflammatory-related genes) in megakaryocytes across conditions.
- e. Dot plots of selected genes (phagocytosis-related genes) in DCs across conditions.
- f. Dot plots of selected genes (antigen presentation-related genes) in DCs across conditions.

Significant differences were determined by Two-sided Student's T-test with Bonferroni correction (\* $p < 0.05$ , \*\* $p < 0.01$ , \*\*\* $p < 0.001$ , \*\*\*\* $p < 0.0001$ , <sup>ns</sup> $p > 0.05$ ). The error bars represent Standard Error (SE), and the median is shown as horizontal bars.
